# Supplementary material for: Cloning, Characterization and Heterologous Expression of the Indolocarbazole Biosynthetic Gene Cluster from Marine-Derived Streptomyces sanyensis FMA
Source: MDPI journal article supplement (doi:10.3390/md11020466), 2013-02-06
Supplement: s1 [file s1]

marinedrugs-11-00466-s001.mol
  corina  05201405123D 1   1.00000     0.00000 
CORINA 3.49 0023  12.04.2013
 35 42  0  0  0  0  0  0  0  0999 V2000
   -0.0105    1.9179   -0.6606 C   0  0  0  0  0  0  0  0  0  0  0  0
   -0.1450    0.5423   -0.5077 C   0  0  0  0  0  0  0  0  0  0  0  0
    1.2399    2.5225   -0.5798 C   0  0  0  0  0  0  0  0  0  0  0  0
    2.3810    1.7391   -0.3473 C   0  0  0  0  0  0  0  0  0  0  0  0
    2.2583    0.3535   -0.1915 C   0  0  0  0  0  0  0  0  0  0  0  0
    1.0017   -0.2505   -0.2669 C   0  0  0  0  0  0  0  0  0  0  0  0
    1.7172    3.9028   -0.6833 C   0  0  0  0  0  0  0  0  0  0  0  0
    3.1194    3.8601   -0.5153 C   0  0  0  0  0  0  0  0  0  0  0  0
    3.5022    2.5547   -0.3173 N   0  0  0  0  0  0  0  0  0  0  0  0
    3.2258   -0.6197    0.0405 N   0  0  0  0  0  0  0  0  0  0  0  0
    2.6176   -1.8470    0.1292 C   0  0  0  0  0  0  0  0  0  0  0  0
    1.2258   -1.6775   -0.0555 C   0  0  0  0  0  0  0  0  0  0  0  0
    1.0447    5.1050   -0.8985 C   0  0  0  0  0  0  0  0  0  0  0  0
    1.8177    6.2541   -0.9410 C   0  0  0  0  0  0  0  0  0  0  0  0
    3.1907    6.2151   -0.7788 C   0  0  0  0  0  0  0  0  0  0  0  0
    3.8754    5.0302   -0.5634 C   0  0  0  0  0  0  0  0  0  0  0  0
    3.1534   -3.1138    0.3592 C   0  0  0  0  0  0  0  0  0  0  0  0
    2.2668   -4.1764    0.3961 C   0  0  0  0  0  0  0  0  0  0  0  0
    0.9049   -4.0084    0.2138 C   0  0  0  0  0  0  0  0  0  0  0  0
    0.3474   -2.7623   -0.0156 C   0  0  0  0  0  0  0  0  0  0  0  0
   -1.5685    0.1968   -0.6439 C   0  0  0  0  0  0  0  0  0  0  0  0
   -2.2990    1.3012   -0.8728 N   0  0  0  0  0  0  0  0  0  0  0  0
   -1.3980    2.4587   -0.9060 C   0  0  0  0  0  0  0  0  0  0  0  0
    4.8691    2.0768   -0.1035 C   0  0  0  0  0  0  0  0  0  0  0  0
    5.5828    1.8810   -1.4354 C   0  0  0  0  0  0  0  0  0  0  0  0
    5.0745    0.5971   -2.1011 C   0  0  0  0  0  0  0  0  0  0  0  0
    5.3688   -0.5757   -1.1591 C   0  0  0  0  0  0  0  0  0  0  0  0
    4.6583   -0.3491    0.1700 C   0  0  0  0  0  0  0  0  0  0  0  0
    4.9170    0.9269    0.7100 O   0  0  0  0  0  0  0  0  0  0  0  0
    5.6092    3.1883    0.6433 C   0  0  0  0  0  0  0  0  0  0  0  0
   -2.0203   -0.9294   -0.5613 O   0  0  0  0  0  0  0  0  0  0  0  0
    3.6272    0.6972   -2.3316 N   0  0  0  0  0  0  0  0  0  0  0  0
    3.3430    1.3165   -3.6330 C   0  0  0  0  0  0  0  0  0  0  0  0
    5.3168    2.9971   -2.2873 O   0  0  0  0  0  0  0  0  0  0  0  0
    6.3705    3.2904   -3.2069 C   0  0  0  0  0  0  0  0  0  0  0  0
  1  2  2  0      
  1  3  1  0      
  3  4  2  0      
  4  5  1  0      
  5  6  2  0      
  6  2  1  0      
  3  7  1  0      
  7  8  1  0      
  8  9  1  0      
  9  4  1  0      
  5 10  1  0      
 10 11  1  0      
 11 12  2  0      
 12  6  1  0      
  7 13  2  0      
 13 14  1  0      
 14 15  2  0      
 15 16  1  0      
 16  8  2  0      
 11 17  1  0      
 17 18  2  0      
 18 19  1  0      
 19 20  2  0      
 20 12  1  0      
  2 21  1  0      
 21 22  1  0      
 22 23  1  0      
 23  1  1  0      
 24 25  1  0      
 25 26  1  0      
 26 27  1  0      
 27 28  1  0      
 28 29  1  0      
 29 24  1  0      
 24  9  1  0      
 28 10  1  0      
 24 30  1  0      
 21 31  2  0      
 26 32  1  0      
 32 33  1  0      
 25 34  1  0      
 34 35  1  0      
M  STY  1   1 SUP
M  SLB  1   1   1
M  SAL   1  2  32  33
M  SBL   1  1  39
M  SMT   1 NHCH3
M  SBV   1 39   -7.7616    5.5527
M  STY  1   2 SUP
M  SLB  1   2   2
M  SAL   2  2  34  35
M  SBL   2  1  41
M  SMT   2 OCH3
M  SBV   2 41   -8.1199    5.7590
M  END
$$$$
