# Supplementary material for: Cloning, Characterization and Heterologous Expression of the Indolocarbazole Biosynthetic Gene Cluster from Marine-Derived Streptomyces sanyensis FMA
Source: MDPI journal article supplement (doi:10.3390/md11020466), 2013-02-06
Supplement: s2 [file s2]

marinedrugs-11-00466-s001.mol
  ChemDraw04241410142D

 35 42  0  0  0  0  0  0  0  0999 V2000
   -0.4125    1.7371    0.0000 C   0  0  0  0  0  0  0  0  0  0  0  0
    0.4125    1.7371    0.0000 C   0  0  0  0  0  0  0  0  0  0  0  0
   -0.8250    1.0226    0.0000 C   0  0  0  0  0  0  0  0  0  0  0  0
   -0.4125    0.3082    0.0000 C   0  0  0  0  0  0  0  0  0  0  0  0
    0.4125    0.3082    0.0000 C   0  0  0  0  0  0  0  0  0  0  0  0
    0.8250    1.0226    0.0000 C   0  0  0  0  0  0  0  0  0  0  0  0
   -1.6320    0.8511    0.0000 C   0  0  0  0  0  0  0  0  0  0  0  0
   -1.7182    0.0306    0.0000 C   0  0  0  0  0  0  0  0  0  0  0  0
   -0.9645   -0.3049    0.0000 N   0  0  0  0  0  0  0  0  0  0  0  0
    0.9645   -0.3049    0.0000 N   0  0  0  0  0  0  0  0  0  0  0  0
    1.7182    0.0306    0.0000 C   0  0  0  0  0  0  0  0  0  0  0  0
    1.6320    0.8511    0.0000 C   0  0  0  0  0  0  0  0  0  0  0  0
   -2.2994    1.3360    0.0000 C   0  0  0  0  0  0  0  0  0  0  0  0
   -3.0531    1.0005    0.0000 C   0  0  0  0  0  0  0  0  0  0  0  0
   -3.1393    0.1800    0.0000 C   0  0  0  0  0  0  0  0  0  0  0  0
   -2.4719   -0.3049    0.0000 C   0  0  0  0  0  0  0  0  0  0  0  0
    2.4719   -0.3049    0.0000 C   0  0  0  0  0  0  0  0  0  0  0  0
    3.1393    0.1800    0.0000 C   0  0  0  0  0  0  0  0  0  0  0  0
    3.0531    1.0005    0.0000 C   0  0  0  0  0  0  0  0  0  0  0  0
    2.2994    1.3360    0.0000 C   0  0  0  0  0  0  0  0  0  0  0  0
    0.6674    2.5217    0.0000 C   0  0  0  0  0  0  0  0  0  0  0  0
    0.0000    3.0066    0.0000 N   0  0  0  0  0  0  0  0  0  0  0  0
   -0.6674    2.5217    0.0000 C   0  0  0  0  0  0  0  0  0  0  0  0
   -0.6938   -1.1504    0.0000 C   0  0  0  0  0  0  0  0  0  0  0  0
   -0.6938   -1.9754    0.0000 C   0  0  0  0  0  0  0  0  0  0  0  0
    0.0206   -2.3879    0.0000 C   0  0  0  0  0  0  0  0  0  0  0  0
    0.7351   -1.9754    0.0000 C   0  0  0  0  0  0  0  0  0  0  0  0
    0.7351   -1.1504    0.0000 C   0  0  0  0  0  0  0  0  0  0  0  0
    0.0206   -0.7379    0.0000 O   0  0  0  0  0  0  0  0  0  0  0  0
   -1.5188   -1.1504    0.0000 C   0  0  0  0  0  0  0  0  0  0  0  0
    1.4643    2.7353    0.0000 O   0  0  0  0  0  0  0  0  0  0  0  0
   -0.3366   -2.5941    0.0000 N   0  0  0  0  0  0  0  0  0  0  0  0
    0.3779   -3.0066    0.0000 C   0  0  0  0  0  0  0  0  0  0  0  0
   -1.4094   -1.9754    0.0000 O   0  0  0  0  0  0  0  0  0  0  0  0
   -0.6949   -2.3879    0.0000 C   0  0  0  0  0  0  0  0  0  0  0  0
  1  2  2  0      
  1  3  1  0      
  3  4  2  0      
  4  5  1  0      
  5  6  2  0      
  6  2  1  0      
  3  7  1  0      
  7  8  1  0      
  8  9  1  0      
  9  4  1  0      
  5 10  1  0      
 10 11  1  0      
 11 12  2  0      
 12  6  1  0      
  7 13  2  0      
 13 14  1  0      
 14 15  2  0      
 15 16  1  0      
 16  8  2  0      
 11 17  1  0      
 17 18  2  0      
 18 19  1  0      
 19 20  2  0      
 20 12  1  0      
  2 21  1  0      
 21 22  1  0      
 22 23  1  0      
 23  1  1  0      
 24 25  1  0      
 25 26  1  0      
 26 27  1  0      
 27 28  1  0      
 28 29  1  0      
 29 24  1  0      
 24  9  1  1      
 28 10  1  1      
 24 30  1  6      
 21 31  2  0      
 26 32  1  1      
 32 33  1  0      
 25 34  1  1      
 34 35  1  0      
M  STY  1   1 SUP
M  SLB  1   1   1
M  SAL   1  2  32  33
M  SBL   1  1  39
M  SMT   1 NHCH3
M  SBV   1 39   -7.7616    5.5527
M  STY  1   2 SUP
M  SLB  1   2   2
M  SAL   2  2  34  35
M  SBL   2  1  41
M  SMT   2 OCH3
M  SBV   2 41   -8.1199    5.7590
M  END
