# Supplementary material for: Cloning, Characterization and Heterologous Expression of the Indolocarbazole Biosynthetic Gene Cluster from Marine-Derived Streptomyces sanyensis FMA
Source: MDPI journal article supplement (doi:10.3390/md11020466), 2013-02-06
Supplement: s3 [file s3]

marinedrugs-11-00466-s002.mol
  corina  05201405133D 1   1.00000     0.00000 
CORINA 3.49 0023  12.04.2013
 35 42  0  0  0  0  0  0  0  0999 V2000
    0.4147    1.0032   -2.8905 C   0  0  0  0  0  0  0  0  0  0  0  0
   -0.0416    0.5356   -1.6607 C   0  0  0  0  0  0  0  0  0  0  0  0
    1.6945    1.5330   -3.0226 C   0  0  0  0  0  0  0  0  0  0  0  0
    2.5171    1.6318   -1.8932 C   0  0  0  0  0  0  0  0  0  0  0  0
    2.0722    1.1589   -0.6529 C   0  0  0  0  0  0  0  0  0  0  0  0
    0.8067    0.5886   -0.5295 C   0  0  0  0  0  0  0  0  0  0  0  0
    2.5047    2.0304   -4.1357 C   0  0  0  0  0  0  0  0  0  0  0  0
    3.7558    2.4093   -3.5932 C   0  0  0  0  0  0  0  0  0  0  0  0
    3.7337    2.1948   -2.2366 N   0  0  0  0  0  0  0  0  0  0  0  0
    2.7305    1.1309    0.5697 N   0  0  0  0  0  0  0  0  0  0  0  0
    1.9375    0.4820    1.4814 C   0  0  0  0  0  0  0  0  0  0  0  0
    0.7156    0.1342    0.8546 C   0  0  0  0  0  0  0  0  0  0  0  0
    2.2313    2.1621   -5.4964 C   0  0  0  0  0  0  0  0  0  0  0  0
    3.2441    2.6724   -6.2920 C   0  0  0  0  0  0  0  0  0  0  0  0
    4.4709    3.0349   -5.7661 C   0  0  0  0  0  0  0  0  0  0  0  0
    4.7600    2.9151   -4.4168 C   0  0  0  0  0  0  0  0  0  0  0  0
    2.1643    0.1594    2.8189 C   0  0  0  0  0  0  0  0  0  0  0  0
    1.1482   -0.4968    3.4920 C   0  0  0  0  0  0  0  0  0  0  0  0
   -0.0486   -0.8279    2.8803 C   0  0  0  0  0  0  0  0  0  0  0  0
   -0.2983   -0.5245    1.5532 C   0  0  0  0  0  0  0  0  0  0  0  0
   -1.4185    0.0470   -1.8329 C   0  0  0  0  0  0  0  0  0  0  0  0
   -1.8117    0.1912   -3.1095 N   0  0  0  0  0  0  0  0  0  0  0  0
   -0.7110    0.7894   -3.8729 C   0  0  0  0  0  0  0  0  0  0  0  0
   -2.1044   -0.4215   -0.9445 O   0  0  0  0  0  0  0  0  0  0  0  0
    4.7707    2.5598   -1.2661 C   0  0  0  0  0  0  0  0  0  0  0  0
    5.6400    1.3208   -0.9698 C   0  0  0  0  0  0  0  0  0  0  0  0
    5.1518    0.8036    0.3990 C   0  0  0  0  0  0  0  0  0  0  0  0
    4.0260    1.7715    0.8172 C   0  0  0  0  0  0  0  0  0  0  0  0
    4.1778    2.9204   -0.0179 O   0  0  0  0  0  0  0  0  0  0  0  0
    5.6369    3.7047   -1.7952 C   0  0  0  0  0  0  0  0  0  0  0  0
    7.0944    1.7083   -0.8940 C   0  0  0  0  0  0  0  0  0  0  0  0
    5.4429    0.3247   -1.9753 O   0  0  0  0  0  0  0  0  0  0  0  0
    7.6018    1.9438    0.1769 O   0  0  0  0  0  0  0  0  0  0  0  0
    7.8261    1.7919   -2.0163 O   0  0  0  0  0  0  0  0  0  0  0  0
    9.2199    2.1705   -1.8678 C   0  0  0  0  0  0  0  0  0  0  0  0
  1  2  2  0      
  1  3  1  0      
  3  4  2  0      
  4  5  1  0      
  5  6  2  0      
  6  2  1  0      
  3  7  1  0      
  7  8  1  0      
  8  9  1  0      
  9  4  1  0      
  5 10  1  0      
 10 11  1  0      
 11 12  2  0      
 12  6  1  0      
  7 13  2  0      
 13 14  1  0      
 14 15  2  0      
 15 16  1  0      
 16  8  2  0      
 11 17  1  0      
 17 18  2  0      
 18 19  1  0      
 19 20  2  0      
 20 12  1  0      
  2 21  1  0      
 21 22  1  0      
 22 23  1  0      
 23  1  1  0      
 21 24  2  0      
 25 26  1  0      
 26 27  1  0      
 27 28  1  0      
 28 29  1  0      
 29 25  1  0      
 25  9  1  0      
 28 10  1  0      
 25 30  1  0      
 26 31  1  0      
 26 32  1  0      
 31 33  2  0      
 31 34  1  0      
 34 35  1  0      
M  STY  1   1 SUP
M  SLB  1   1   1
M  SAL   1  2  34  35
M  SBL   1  1  41
M  SMT   1 OCH3
M  SBV   1 41   -7.2121    5.7427
M  END
$$$$
