# Supplementary material for: Cloning, Characterization and Heterologous Expression of the Indolocarbazole Biosynthetic Gene Cluster from Marine-Derived Streptomyces sanyensis FMA
Source: MDPI journal article supplement (doi:10.3390/md11020466), 2013-02-06
Supplement: s4 [file s4]

marinedrugs-11-00466-s002.mol
  ChemDraw04241410142D

 35 42  0  0  0  0  0  0  0  0999 V2000
   -0.4125    2.0712    0.0000 C   0  0  0  0  0  0  0  0  0  0  0  0
    0.4125    2.0712    0.0000 C   0  0  0  0  0  0  0  0  0  0  0  0
   -0.8250    1.3568    0.0000 C   0  0  0  0  0  0  0  0  0  0  0  0
   -0.4125    0.6423    0.0000 C   0  0  0  0  0  0  0  0  0  0  0  0
    0.4125    0.6423    0.0000 C   0  0  0  0  0  0  0  0  0  0  0  0
    0.8250    1.3568    0.0000 C   0  0  0  0  0  0  0  0  0  0  0  0
   -1.6320    1.1852    0.0000 C   0  0  0  0  0  0  0  0  0  0  0  0
   -1.7182    0.3647    0.0000 C   0  0  0  0  0  0  0  0  0  0  0  0
   -0.9645    0.0292    0.0000 N   0  0  0  0  0  0  0  0  0  0  0  0
    0.9645    0.0292    0.0000 N   0  0  0  0  0  0  0  0  0  0  0  0
    1.7182    0.3647    0.0000 C   0  0  0  0  0  0  0  0  0  0  0  0
    1.6320    1.1852    0.0000 C   0  0  0  0  0  0  0  0  0  0  0  0
   -2.2994    1.6702    0.0000 C   0  0  0  0  0  0  0  0  0  0  0  0
   -3.0531    1.3346    0.0000 C   0  0  0  0  0  0  0  0  0  0  0  0
   -3.1393    0.5141    0.0000 C   0  0  0  0  0  0  0  0  0  0  0  0
   -2.4719    0.0292    0.0000 C   0  0  0  0  0  0  0  0  0  0  0  0
    2.4719    0.0292    0.0000 C   0  0  0  0  0  0  0  0  0  0  0  0
    3.1393    0.5141    0.0000 C   0  0  0  0  0  0  0  0  0  0  0  0
    3.0531    1.3346    0.0000 C   0  0  0  0  0  0  0  0  0  0  0  0
    2.2994    1.6702    0.0000 C   0  0  0  0  0  0  0  0  0  0  0  0
    0.6674    2.8558    0.0000 C   0  0  0  0  0  0  0  0  0  0  0  0
    0.0000    3.3408    0.0000 N   0  0  0  0  0  0  0  0  0  0  0  0
   -0.6674    2.8558    0.0000 C   0  0  0  0  0  0  0  0  0  0  0  0
    1.4643    3.0694    0.0000 O   0  0  0  0  0  0  0  0  0  0  0  0
   -0.6228   -1.1121    0.0000 C   0  0  0  0  0  0  0  0  0  0  0  0
   -0.3693   -1.8972    0.0000 C   0  0  0  0  0  0  0  0  0  0  0  0
    0.4557   -1.8988    0.0000 C   0  0  0  0  0  0  0  0  0  0  0  0
    0.7121   -1.1147    0.0000 C   0  0  0  0  0  0  0  0  0  0  0  0
    0.0456   -0.6285    0.0000 O   0  0  0  0  0  0  0  0  0  0  0  0
   -1.4478   -1.1121    0.0000 C   0  0  0  0  0  0  0  0  0  0  0  0
   -0.3693   -2.7222    0.0000 C   0  0  0  0  0  0  0  0  0  0  0  0
   -1.1662   -2.1108    0.0000 O   0  0  0  0  0  0  0  0  0  0  0  0
   -1.0838   -3.1347    0.0000 O   0  0  0  0  0  0  0  0  0  0  0  0
   -0.0121   -2.9283    0.0000 O   0  0  0  0  0  0  0  0  0  0  0  0
    0.7024   -3.3408    0.0000 C   0  0  0  0  0  0  0  0  0  0  0  0
  1  2  2  0      
  1  3  1  0      
  3  4  2  0      
  4  5  1  0      
  5  6  2  0      
  6  2  1  0      
  3  7  1  0      
  7  8  1  0      
  8  9  1  0      
  9  4  1  0      
  5 10  1  0      
 10 11  1  0      
 11 12  2  0      
 12  6  1  0      
  7 13  2  0      
 13 14  1  0      
 14 15  2  0      
 15 16  1  0      
 16  8  2  0      
 11 17  1  0      
 17 18  2  0      
 18 19  1  0      
 19 20  2  0      
 20 12  1  0      
  2 21  1  0      
 21 22  1  0      
 22 23  1  0      
 23  1  1  0      
 21 24  2  0      
 25 26  1  0      
 26 27  1  0      
 27 28  1  0      
 28 29  1  0      
 29 25  1  0      
 25  9  1  1      
 28 10  1  1      
 25 30  1  6      
 26 31  1  6      
 26 32  1  1      
 31 33  2  0      
 31 34  1  0      
 34 35  1  0      
M  STY  1   1 SUP
M  SLB  1   1   1
M  SAL   1  2  34  35
M  SBL   1  1  41
M  SMT   1 OCH3
M  SBV   1 41   -7.2121    5.7427
M  END
