# Supplementary material for: Cloning, Characterization and Heterologous Expression of the Indolocarbazole Biosynthetic Gene Cluster from Marine-Derived Streptomyces sanyensis FMA
Source: MDPI journal article supplement (doi:10.3390/md11020466), 2013-02-06
Supplement: s5 [file s5]

marinedrugs-11-00466-s003.mol
  corina  05201405133D 1   1.00000     0.00000 
CORINA 3.49 0023  12.04.2013
 39 45  0  0  0  0  0  0  0  0999 V2000
    1.3929    2.5564    0.5483 C   0  0  0  0  0  0  0  0  0  0  0  0
    1.6581    1.4615    1.3895 C   0  0  0  0  0  0  0  0  0  0  0  0
    2.1997    2.7857   -0.5734 C   0  0  0  0  0  0  0  0  0  0  0  0
    3.2721    1.9262   -0.8605 C   0  0  0  0  0  0  0  0  0  0  0  0
    3.5364    0.8352   -0.0224 C   0  0  0  0  0  0  0  0  0  0  0  0
    2.7284    0.6048    1.1024 C   0  0  0  0  0  0  0  0  0  0  0  0
    2.1944    3.8124   -1.6291 C   0  0  0  0  0  0  0  0  0  0  0  0
    3.2632    3.5082   -2.4865 C   0  0  0  0  0  0  0  0  0  0  0  0
    3.8955    2.3753   -2.0084 N   0  0  0  0  0  0  0  0  0  0  0  0
    4.5069   -0.1464   -0.0704 N   0  0  0  0  0  0  0  0  0  0  0  0
    4.3607   -1.0186    0.9923 C   0  0  0  0  0  0  0  0  0  0  0  0
    3.2640   -0.5987    1.7605 C   0  0  0  0  0  0  0  0  0  0  0  0
    1.3859    4.9185   -1.8869 C   0  0  0  0  0  0  0  0  0  0  0  0
    1.6399    5.7107   -2.9854 C   0  0  0  0  0  0  0  0  0  0  0  0
    2.6949    5.4119   -3.8340 C   0  0  0  0  0  0  0  0  0  0  0  0
    3.5035    4.3207   -3.5913 C   0  0  0  0  0  0  0  0  0  0  0  0
    5.0728   -2.1502    1.3822 C   0  0  0  0  0  0  0  0  0  0  0  0
    4.6979   -2.8457    2.5125 C   0  0  0  0  0  0  0  0  0  0  0  0
    3.6132   -2.4293    3.2698 C   0  0  0  0  0  0  0  0  0  0  0  0
    2.8968   -1.3119    2.9012 C   0  0  0  0  0  0  0  0  0  0  0  0
    0.6398    1.5122    2.4537 C   0  0  0  0  0  0  0  0  0  0  0  0
   -0.1585    2.5721    2.2331 N   0  0  0  0  0  0  0  0  0  0  0  0
    0.2180    3.2346    1.1246 C   0  0  0  0  0  0  0  0  0  0  0  0
    0.5381    0.7275    3.3758 O   0  0  0  0  0  0  0  0  0  0  0  0
   -0.3157    4.2307    0.6781 O   0  0  0  0  0  0  0  0  0  0  0  0
    4.8206    3.9608   -4.6634 Cl  0  0  0  0  0  0  0  0  0  0  0  0
    6.4324   -2.6856    0.4449 Cl  0  0  0  0  0  0  0  0  0  0  0  0
    5.5431   -0.2491   -1.1009 C   0  0  0  0  0  0  0  0  0  0  0  0
    6.2720   -1.4656   -0.9243 O   0  0  0  0  0  0  0  0  0  0  0  0
    5.4656   -2.6436   -0.9894 C   0  0  0  0  0  0  0  0  0  0  0  0
    4.8084   -2.7348   -2.3690 C   0  0  0  0  0  0  0  0  0  0  0  0
    3.9801   -1.4701   -2.6160 C   0  0  0  0  0  0  0  0  0  0  0  0
    4.8890   -0.2441   -2.4850 C   0  0  0  0  0  0  0  0  0  0  0  0
    4.1123    0.9451   -2.6419 O   0  0  0  0  0  0  0  0  0  0  0  0
    6.3430   -3.8758   -0.7597 C   0  0  0  0  0  0  0  0  0  0  0  0
    5.8607   -4.5992    0.3744 O   0  0  0  0  0  0  0  0  0  0  0  0
    3.4223   -1.5133   -3.9309 O   0  0  0  0  0  0  0  0  0  0  0  0
    5.8191   -2.8474   -3.3729 O   0  0  0  0  0  0  0  0  0  0  0  0
    5.4115   -3.5833   -4.5280 C   0  0  0  0  0  0  0  0  0  0  0  0
  1  2  2  0      
  1  3  1  0      
  3  4  2  0      
  4  5  1  0      
  5  6  2  0      
  6  2  1  0      
  3  7  1  0      
  7  8  1  0      
  8  9  1  0      
  9  4  1  0      
  5 10  1  0      
 10 11  1  0      
 11 12  2  0      
 12  6  1  0      
  7 13  2  0      
 13 14  1  0      
 14 15  2  0      
 15 16  1  0      
 16  8  2  0      
 11 17  1  0      
 17 18  2  0      
 18 19  1  0      
 19 20  2  0      
 20 12  1  0      
  2 21  1  0      
 21 22  1  0      
 22 23  1  0      
 23  1  1  0      
 21 24  2  0      
 23 25  2  0      
 16 26  1  0      
 17 27  1  0      
 28 29  1  0      
 29 30  1  0      
 30 31  1  0      
 31 32  1  0      
 32 33  1  0      
 33 28  1  0      
 10 28  1  0      
 33 34  1  0      
 30 35  1  0      
 35 36  1  0      
 32 37  1  0      
 31 38  1  0      
 38 39  1  0      
M  STY  1   1 SUP
M  SLB  1   1   1
M  SAL   1  2  38  39
M  SBL   1  1  44
M  SMT   1 OCH3
M  SBV   1 44   -7.3026    5.7825
M  END
$$$$
