# Supplementary material for: Cloning, Characterization and Heterologous Expression of the Indolocarbazole Biosynthetic Gene Cluster from Marine-Derived Streptomyces sanyensis FMA
Source: MDPI journal article supplement (doi:10.3390/md11020466), 2013-02-06
Supplement: s6 [file s6]

marinedrugs-11-00466-s003.mol
  ChemDraw04241410142D

 39 45  0  0  0  0  0  0  0  0999 V2000
   -0.4125    2.3717    0.0000 C   0  0  0  0  0  0  0  0  0  0  0  0
    0.4125    2.3717    0.0000 C   0  0  0  0  0  0  0  0  0  0  0  0
   -0.8250    1.6572    0.0000 C   0  0  0  0  0  0  0  0  0  0  0  0
   -0.4125    0.9427    0.0000 C   0  0  0  0  0  0  0  0  0  0  0  0
    0.4125    0.9427    0.0000 C   0  0  0  0  0  0  0  0  0  0  0  0
    0.8250    1.6572    0.0000 C   0  0  0  0  0  0  0  0  0  0  0  0
   -1.6320    1.4857    0.0000 C   0  0  0  0  0  0  0  0  0  0  0  0
   -1.7182    0.6652    0.0000 C   0  0  0  0  0  0  0  0  0  0  0  0
   -0.9645    0.3296    0.0000 N   0  0  0  0  0  0  0  0  0  0  0  0
    0.9645    0.3296    0.0000 N   0  0  0  0  0  0  0  0  0  0  0  0
    1.7182    0.6652    0.0000 C   0  0  0  0  0  0  0  0  0  0  0  0
    1.6320    1.4857    0.0000 C   0  0  0  0  0  0  0  0  0  0  0  0
   -2.2994    1.9706    0.0000 C   0  0  0  0  0  0  0  0  0  0  0  0
   -3.0531    1.6350    0.0000 C   0  0  0  0  0  0  0  0  0  0  0  0
   -3.1393    0.8146    0.0000 C   0  0  0  0  0  0  0  0  0  0  0  0
   -2.4719    0.3296    0.0000 C   0  0  0  0  0  0  0  0  0  0  0  0
    2.4719    0.3296    0.0000 C   0  0  0  0  0  0  0  0  0  0  0  0
    3.1393    0.8146    0.0000 C   0  0  0  0  0  0  0  0  0  0  0  0
    3.0531    1.6350    0.0000 C   0  0  0  0  0  0  0  0  0  0  0  0
    2.2994    1.9706    0.0000 C   0  0  0  0  0  0  0  0  0  0  0  0
    0.6674    3.1563    0.0000 C   0  0  0  0  0  0  0  0  0  0  0  0
    0.0000    3.6412    0.0000 N   0  0  0  0  0  0  0  0  0  0  0  0
   -0.6674    3.1563    0.0000 C   0  0  0  0  0  0  0  0  0  0  0  0
    1.4643    3.3698    0.0000 O   0  0  0  0  0  0  0  0  0  0  0  0
   -1.4643    3.3698    0.0000 O   0  0  0  0  0  0  0  0  0  0  0  0
   -2.4719   -0.4954    0.0000 Cl  0  0  0  0  0  0  0  0  0  0  0  0
    2.4719   -0.4954    0.0000 Cl  0  0  0  0  0  0  0  0  0  0  0  0
    0.9710   -0.5190    0.0000 C   0  0  0  0  0  0  0  0  0  0  0  0
    0.4202   -1.1715    0.0000 O   0  0  0  0  0  0  0  0  0  0  0  0
    0.9040   -1.8751    0.0000 C   0  0  0  0  0  0  0  0  0  0  0  0
    0.9790   -2.7208    0.0000 C   0  0  0  0  0  0  0  0  0  0  0  0
    1.5298   -2.0684    0.0000 C   0  0  0  0  0  0  0  0  0  0  0  0
    1.0460   -1.3647    0.0000 C   0  0  0  0  0  0  0  0  0  0  0  0
    1.4585   -0.6502    0.0000 O   0  0  0  0  0  0  0  0  0  0  0  0
    0.3207   -2.4585    0.0000 C   0  0  0  0  0  0  0  0  0  0  0  0
   -0.4762   -2.2449    0.0000 O   0  0  0  0  0  0  0  0  0  0  0  0
    1.5298   -2.8934    0.0000 O   0  0  0  0  0  0  0  0  0  0  0  0
    1.1839   -3.2287    0.0000 O   0  0  0  0  0  0  0  0  0  0  0  0
    1.8983   -3.6412    0.0000 C   0  0  0  0  0  0  0  0  0  0  0  0
  1  2  2  0      
  1  3  1  0      
  3  4  2  0      
  4  5  1  0      
  5  6  2  0      
  6  2  1  0      
  3  7  1  0      
  7  8  1  0      
  8  9  1  0      
  9  4  1  0      
  5 10  1  0      
 10 11  1  0      
 11 12  2  0      
 12  6  1  0      
  7 13  2  0      
 13 14  1  0      
 14 15  2  0      
 15 16  1  0      
 16  8  2  0      
 11 17  1  0      
 17 18  2  0      
 18 19  1  0      
 19 20  2  0      
 20 12  1  0      
  2 21  1  0      
 21 22  1  0      
 22 23  1  0      
 23  1  1  0      
 21 24  2  0      
 23 25  2  0      
 16 26  1  0      
 17 27  1  0      
 28 29  1  0      
 29 30  1  0      
 30 31  1  0      
 31 32  1  0      
 32 33  1  0      
 33 28  1  0      
 10 28  1  0      
 33 34  1  0      
 30 35  1  0      
 35 36  1  0      
 32 37  1  0      
 31 38  1  0      
 38 39  1  0      
M  STY  1   1 SUP
M  SLB  1   1   1
M  SAL   1  2  38  39
M  SBL   1  1  44
M  SMT   1 OCH3
M  SBV   1 44   -7.3026    5.7825
M  END
