# Supplementary material for: Cloning, Characterization and Heterologous Expression of the Indolocarbazole Biosynthetic Gene Cluster from Marine-Derived Streptomyces sanyensis FMA
Source: MDPI journal article supplement (doi:10.3390/md11020466), 2013-02-06
Supplement: s7 [file s7]

marinedrugs-11-00466-s004.mol
  corina  05201405133D 1   1.00000     0.00000 
CORINA 3.49 0023  12.04.2013
 47 54  0  0  0  0  0  0  0  0999 V2000
    0.5085   -3.3426    0.6158 C   0  0  0  0  0  0  0  0  0  0  0  0
    0.4603   -2.1582    1.3717 C   0  0  0  0  0  0  0  0  0  0  0  0
    1.5163   -3.5191   -0.3408 C   0  0  0  0  0  0  0  0  0  0  0  0
    2.4781   -2.5173   -0.5471 C   0  0  0  0  0  0  0  0  0  0  0  0
    2.4303   -1.3373    0.2063 C   0  0  0  0  0  0  0  0  0  0  0  0
    1.4203   -1.1593    1.1653 C   0  0  0  0  0  0  0  0  0  0  0  0
    1.8435   -4.6093   -1.2752 C   0  0  0  0  0  0  0  0  0  0  0  0
    2.9817   -4.1968   -1.9862 C   0  0  0  0  0  0  0  0  0  0  0  0
    3.3453   -2.9419   -1.5351 N   0  0  0  0  0  0  0  0  0  0  0  0
    3.2347   -0.2144    0.2065 N   0  0  0  0  0  0  0  0  0  0  0  0
    2.7827    0.6995    1.1406 C   0  0  0  0  0  0  0  0  0  0  0  0
    1.6499    0.1630    1.7714 C   0  0  0  0  0  0  0  0  0  0  0  0
    1.2682   -5.8511   -1.5393 C   0  0  0  0  0  0  0  0  0  0  0  0
    1.8206   -6.6708   -2.4996 C   0  0  0  0  0  0  0  0  0  0  0  0
    2.9446   -6.2646   -3.2024 C   0  0  0  0  0  0  0  0  0  0  0  0
    3.5240   -5.0391   -2.9517 C   0  0  0  0  0  0  0  0  0  0  0  0
    3.2402    1.9598    1.5173 C   0  0  0  0  0  0  0  0  0  0  0  0
    2.5817    2.6670    2.5013 C   0  0  0  0  0  0  0  0  0  0  0  0
    1.4625    2.1346    3.1239 C   0  0  0  0  0  0  0  0  0  0  0  0
    0.9939    0.8900    2.7643 C   0  0  0  0  0  0  0  0  0  0  0  0
   -0.7014   -2.2967    2.2681 C   0  0  0  0  0  0  0  0  0  0  0  0
   -1.2812   -3.4883    2.0375 N   0  0  0  0  0  0  0  0  0  0  0  0
   -0.6289   -4.1611    1.0725 C   0  0  0  0  0  0  0  0  0  0  0  0
   -1.0733   -1.4723    3.0796 O   0  0  0  0  0  0  0  0  0  0  0  0
   -0.9234   -5.2628    0.6530 O   0  0  0  0  0  0  0  0  0  0  0  0
    4.6399    2.6406    0.7485 Cl  0  0  0  0  0  0  0  0  0  0  0  0
    4.4002   -0.0195   -0.6593 C   0  0  0  0  0  0  0  0  0  0  0  0
    5.6454    0.1978    0.2028 C   0  0  0  0  0  0  0  0  0  0  0  0
    5.8699   -1.0266    1.0923 C   0  0  0  0  0  0  0  0  0  0  0  0
    6.0665   -2.2649    0.2154 C   0  0  0  0  0  0  0  0  0  0  0  0
    4.8213   -2.4822   -0.6468 C   0  0  0  0  0  0  0  0  0  0  0  0
    4.5968   -1.2577   -1.5363 C   0  0  0  0  0  0  0  0  0  0  0  0
    3.4339   -1.4607   -2.3415 O   0  0  0  0  0  0  0  0  0  0  0  0
    7.1150   -0.8093    1.9544 C   0  0  0  0  0  0  0  0  0  0  0  0
    5.0050   -3.6387   -1.4658 O   0  0  0  0  0  0  0  0  0  0  0  0
    6.8869    0.2759    2.8557 O   0  0  0  0  0  0  0  0  0  0  0  0
    9.3290   -0.3703    5.4719 C   0  0  0  0  0  0  0  0  0  0  0  0
    9.0760    0.8419    6.3722 C   0  0  0  0  0  0  0  0  0  0  0  0
    8.8540    2.0799    5.4979 C   0  0  0  0  0  0  0  0  0  0  0  0
    7.6881    1.8131    4.5409 C   0  0  0  0  0  0  0  0  0  0  0  0
    7.9946    0.5635    3.7114 C   0  0  0  0  0  0  0  0  0  0  0  0
    8.2210   -0.5436    4.5862 O   0  0  0  0  0  0  0  0  0  0  0  0
    8.5445    3.2016    6.3274 O   0  0  0  0  0  0  0  0  0  0  0  0
    7.8831    0.6017    7.1952 N   0  0  0  0  0  0  0  0  0  0  0  0
    8.2245   -0.1497    8.4104 C   0  0  0  0  0  0  0  0  0  0  0  0
    7.2034   -2.0748   -0.6292 O   0  0  0  0  0  0  0  0  0  0  0  0
    7.8858   -3.2842   -0.9662 C   0  0  0  0  0  0  0  0  0  0  0  0
  1  2  2  0      
  1  3  1  0      
  3  4  2  0      
  4  5  1  0      
  5  6  2  0      
  6  2  1  0      
  3  7  1  0      
  7  8  1  0      
  8  9  1  0      
  9  4  1  0      
  5 10  1  0      
 10 11  1  0      
 11 12  2  0      
 12  6  1  0      
  7 13  2  0      
 13 14  1  0      
 14 15  2  0      
 15 16  1  0      
 16  8  2  0      
 11 17  1  0      
 17 18  2  0      
 18 19  1  0      
 19 20  2  0      
 20 12  1  0      
  2 21  1  0      
 21 22  1  0      
 22 23  1  0      
 23  1  1  0      
 21 24  2  0      
 23 25  2  0      
 17 26  1  0      
 27 28  1  0      
 28 29  1  0      
 29 30  1  0      
 30 31  1  0      
 31 32  1  0      
 32 27  1  0      
 32 33  1  0      
 29 34  1  0      
 31 35  1  0      
 10 27  1  0      
 34 36  1  0      
 37 38  1  0      
 38 39  1  0      
 39 40  1  0      
 40 41  1  0      
 41 42  1  0      
 42 37  1  0      
 36 41  1  0      
 39 43  1  0      
 38 44  1  0      
 44 45  1  0      
 30 46  1  0      
 46 47  1  0      
M  STY  1   1 SUP
M  SLB  1   1   1
M  SAL   1  2  46  47
M  SBL   1  1  53
M  SMT   1 OCH3
M  SBV   1 53   -6.8617    5.1770
M  END
$$$$
