# Supplementary material for: Cloning, Characterization and Heterologous Expression of the Indolocarbazole Biosynthetic Gene Cluster from Marine-Derived Streptomyces sanyensis FMA
Source: MDPI journal article supplement (doi:10.3390/md11020466), 2013-02-06
Supplement: s8 [file s8]

marinedrugs-11-00466-s004.mol
  ChemDraw04241410152D

 47 54  0  0  0  0  0  0  0  0999 V2000
    0.8669    2.2776    0.0000 C   0  0  0  0  0  0  0  0  0  0  0  0
    1.6919    2.2776    0.0000 C   0  0  0  0  0  0  0  0  0  0  0  0
    0.4544    1.5631    0.0000 C   0  0  0  0  0  0  0  0  0  0  0  0
    0.8669    0.8486    0.0000 C   0  0  0  0  0  0  0  0  0  0  0  0
    1.6919    0.8486    0.0000 C   0  0  0  0  0  0  0  0  0  0  0  0
    2.1044    1.5631    0.0000 C   0  0  0  0  0  0  0  0  0  0  0  0
   -0.3526    1.3916    0.0000 C   0  0  0  0  0  0  0  0  0  0  0  0
   -0.4388    0.5711    0.0000 C   0  0  0  0  0  0  0  0  0  0  0  0
    0.3149    0.2355    0.0000 N   0  0  0  0  0  0  0  0  0  0  0  0
    2.2439    0.2355    0.0000 N   0  0  0  0  0  0  0  0  0  0  0  0
    2.9976    0.5711    0.0000 C   0  0  0  0  0  0  0  0  0  0  0  0
    2.9114    1.3916    0.0000 C   0  0  0  0  0  0  0  0  0  0  0  0
   -1.0200    1.8765    0.0000 C   0  0  0  0  0  0  0  0  0  0  0  0
   -1.7737    1.5410    0.0000 C   0  0  0  0  0  0  0  0  0  0  0  0
   -1.8599    0.7205    0.0000 C   0  0  0  0  0  0  0  0  0  0  0  0
   -1.1925    0.2355    0.0000 C   0  0  0  0  0  0  0  0  0  0  0  0
    3.7513    0.2355    0.0000 C   0  0  0  0  0  0  0  0  0  0  0  0
    4.4187    0.7205    0.0000 C   0  0  0  0  0  0  0  0  0  0  0  0
    4.3325    1.5410    0.0000 C   0  0  0  0  0  0  0  0  0  0  0  0
    3.5788    1.8765    0.0000 C   0  0  0  0  0  0  0  0  0  0  0  0
    1.9468    3.0622    0.0000 C   0  0  0  0  0  0  0  0  0  0  0  0
    1.2794    3.5471    0.0000 N   0  0  0  0  0  0  0  0  0  0  0  0
    0.6120    3.0622    0.0000 C   0  0  0  0  0  0  0  0  0  0  0  0
    2.7437    3.2757    0.0000 O   0  0  0  0  0  0  0  0  0  0  0  0
   -0.1849    3.2757    0.0000 O   0  0  0  0  0  0  0  0  0  0  0  0
    3.7513   -0.5895    0.0000 Cl  0  0  0  0  0  0  0  0  0  0  0  0
    2.2551   -0.7514    0.0000 C   0  0  0  0  0  0  0  0  0  0  0  0
    1.4037   -0.6862    0.0000 C   0  0  0  0  0  0  0  0  0  0  0  0
    1.1159   -1.4901    0.0000 C   0  0  0  0  0  0  0  0  0  0  0  0
    0.4737   -2.0454    0.0000 C   0  0  0  0  0  0  0  0  0  0  0  0
    1.3250   -2.1107    0.0000 C   0  0  0  0  0  0  0  0  0  0  0  0
    1.6129   -1.3068    0.0000 C   0  0  0  0  0  0  0  0  0  0  0  0
    2.4098   -1.0933    0.0000 O   0  0  0  0  0  0  0  0  0  0  0  0
    0.3015   -1.3580    0.0000 C   0  0  0  0  0  0  0  0  0  0  0  0
    0.9125   -2.8252    0.0000 O   0  0  0  0  0  0  0  0  0  0  0  0
   -0.2819   -1.9413    0.0000 O   0  0  0  0  0  0  0  0  0  0  0  0
   -2.4530   -2.4542    0.0000 C   0  0  0  0  0  0  0  0  0  0  0  0
   -2.9074   -3.1428    0.0000 C   0  0  0  0  0  0  0  0  0  0  0  0
   -2.1020   -2.9638    0.0000 C   0  0  0  0  0  0  0  0  0  0  0  0
   -1.3189   -3.2376    0.0000 C   0  0  0  0  0  0  0  0  0  0  0  0
   -0.8644   -2.5490    0.0000 C   0  0  0  0  0  0  0  0  0  0  0  0
   -1.6699   -2.7280    0.0000 O   0  0  0  0  0  0  0  0  0  0  0  0
   -2.6854   -3.5471    0.0000 O   0  0  0  0  0  0  0  0  0  0  0  0
   -3.7043   -2.9293    0.0000 N   0  0  0  0  0  0  0  0  0  0  0  0
   -4.4187   -3.3418    0.0000 C   0  0  0  0  0  0  0  0  0  0  0  0
   -0.1393   -2.7348    0.0000 O   0  0  0  0  0  0  0  0  0  0  0  0
   -0.7226   -2.1514    0.0000 C   0  0  0  0  0  0  0  0  0  0  0  0
  1  2  2  0      
  1  3  1  0      
  3  4  2  0      
  4  5  1  0      
  5  6  2  0      
  6  2  1  0      
  3  7  1  0      
  7  8  1  0      
  8  9  1  0      
  9  4  1  0      
  5 10  1  0      
 10 11  1  0      
 11 12  2  0      
 12  6  1  0      
  7 13  2  0      
 13 14  1  0      
 14 15  2  0      
 15 16  1  0      
 16  8  2  0      
 11 17  1  0      
 17 18  2  0      
 18 19  1  0      
 19 20  2  0      
 20 12  1  0      
  2 21  1  0      
 21 22  1  0      
 22 23  1  0      
 23  1  1  0      
 21 24  2  0      
 23 25  2  0      
 17 26  1  0      
 27 28  1  0      
 28 29  1  0      
 29 30  1  0      
 30 31  1  0      
 31 32  1  0      
 32 27  1  0      
 32 33  1  0      
 29 34  1  0      
 31 35  1  0      
 10 27  1  0      
 34 36  1  0      
 37 38  1  0      
 38 39  1  0      
 39 40  1  0      
 40 41  1  0      
 41 42  1  0      
 42 37  1  0      
 36 41  1  0      
 39 43  1  0      
 38 44  1  0      
 44 45  1  0      
 30 46  1  0      
 46 47  1  0      
M  STY  1   1 SUP
M  SLB  1   1   1
M  SAL   1  2  46  47
M  SBL   1  1  53
M  SMT   1 OCH3
M  SBV   1 53   -6.8617    5.1770
M  END
