# Supplementary material for: Cloning, Characterization and Heterologous Expression of the Indolocarbazole Biosynthetic Gene Cluster from Marine-Derived Streptomyces sanyensis FMA
Source: MDPI journal article supplement (doi:10.3390/md11020466), 2013-02-06
Supplement: s9 [file s9]

marinedrugs-11-00466-s005.mol
  corina  05201405133D 1   1.00000     0.00000 
CORINA 3.49 0023  12.04.2013
 36 43  0  0  0  0  0  0  0  0999 V2000
    0.1393    2.1291   -0.2826 C   0  0  0  0  0  0  0  0  0  0  0  0
   -0.0949    0.7594   -0.2498 C   0  0  0  0  0  0  0  0  0  0  0  0
    1.4343    2.6285   -0.1928 C   0  0  0  0  0  0  0  0  0  0  0  0
    2.5203    1.7498   -0.0431 C   0  0  0  0  0  0  0  0  0  0  0  0
    2.2962    0.3666   -0.0106 C   0  0  0  0  0  0  0  0  0  0  0  0
    0.9965   -0.1318   -0.1261 C   0  0  0  0  0  0  0  0  0  0  0  0
    2.0099    3.9739   -0.2431 C   0  0  0  0  0  0  0  0  0  0  0  0
    3.4072    3.8186   -0.1143 C   0  0  0  0  0  0  0  0  0  0  0  0
    3.6930    2.4786    0.0232 N   0  0  0  0  0  0  0  0  0  0  0  0
    3.1851   -0.6969    0.1238 N   0  0  0  0  0  0  0  0  0  0  0  0
    2.4879   -1.8793    0.0496 C   0  0  0  0  0  0  0  0  0  0  0  0
    1.1136   -1.5869   -0.0992 C   0  0  0  0  0  0  0  0  0  0  0  0
    1.4257    5.2318   -0.3840 C   0  0  0  0  0  0  0  0  0  0  0  0
    2.2836    6.3200   -0.3959 C   0  0  0  0  0  0  0  0  0  0  0  0
    3.6534    6.1704   -0.2754 C   0  0  0  0  0  0  0  0  0  0  0  0
    4.2503    4.9282   -0.1323 C   0  0  0  0  0  0  0  0  0  0  0  0
    2.9320   -3.2002    0.1010 C   0  0  0  0  0  0  0  0  0  0  0  0
    1.9704   -4.1919    0.0056 C   0  0  0  0  0  0  0  0  0  0  0  0
    0.6241   -3.9032   -0.1362 C   0  0  0  0  0  0  0  0  0  0  0  0
    0.1580   -2.6009   -0.1923 C   0  0  0  0  0  0  0  0  0  0  0  0
   -1.5439    0.5324   -0.3624 C   0  0  0  0  0  0  0  0  0  0  0  0
   -2.1946    1.7039   -0.4636 N   0  0  0  0  0  0  0  0  0  0  0  0
   -1.2093    2.7907   -0.4275 C   0  0  0  0  0  0  0  0  0  0  0  0
    5.0333    1.9254    0.2509 C   0  0  0  0  0  0  0  0  0  0  0  0
    5.6425    1.6064   -1.0882 C   0  0  0  0  0  0  0  0  0  0  0  0
    5.7608    0.3830   -1.5352 C   0  0  0  0  0  0  0  0  0  0  0  0
    5.3869   -0.7104   -0.8341 O   0  0  0  0  0  0  0  0  0  0  0  0
    4.6207   -0.5654    0.3426 C   0  0  0  0  0  0  0  0  0  0  0  0
    4.9746    0.6835    1.1202 C   0  0  0  0  0  0  0  0  0  0  0  0
    6.3464    0.1812   -2.9091 C   0  0  0  0  0  0  0  0  0  0  0  0
   -2.0774   -0.5606   -0.3641 O   0  0  0  0  0  0  0  0  0  0  0  0
    7.6003   -0.4951   -2.7978 O   0  0  0  0  0  0  0  0  0  0  0  0
    6.0871    2.6312   -1.8643 O   0  0  0  0  0  0  0  0  0  0  0  0
    7.2213    3.3595   -1.3899 C   0  0  0  0  0  0  0  0  0  0  0  0
    5.8266    2.9190    0.9033 O   0  0  0  0  0  0  0  0  0  0  0  0
    5.4106    3.2099    2.2391 C   0  0  0  0  0  0  0  0  0  0  0  0
  1  2  2  0      
  1  3  1  0      
  3  4  2  0      
  4  5  1  0      
  5  6  2  0      
  6  2  1  0      
  3  7  1  0      
  7  8  1  0      
  8  9  1  0      
  9  4  1  0      
  5 10  1  0      
 10 11  1  0      
 11 12  2  0      
 12  6  1  0      
  7 13  2  0      
 13 14  1  0      
 14 15  2  0      
 15 16  1  0      
 16  8  2  0      
 11 17  1  0      
 17 18  2  0      
 18 19  1  0      
 19 20  2  0      
 20 12  1  0      
  2 21  1  0      
 21 22  1  0      
 22 23  1  0      
 23  1  1  0      
 24 25  1  0      
 25 26  2  0      
 26 27  1  0      
 27 28  1  0      
 28 29  1  0      
 29 24  1  0      
 21 31  2  0      
 24  9  1  0      
 28 10  1  0      
 26 30  1  0      
 30 32  1  0      
 25 33  1  0      
 33 34  1  0      
 24 35  1  0      
 35 36  1  0      
M  STY  1   1 SUP
M  SLB  1   1   1
M  SAL   1  2  33  34
M  SBL   1  1  40
M  SMT   1 OCH3
M  SBV   1 40   -8.2437    6.0065
M  STY  1   2 SUP
M  SLB  1   2   2
M  SAL   2  2  35  36
M  SBL   2  1  42
M  SMT   2 OCH3
M  SBV   2 42   -8.3980    5.8309
M  END
$$$$
