# Supplementary material for: Cloning, Characterization and Heterologous Expression of the Indolocarbazole Biosynthetic Gene Cluster from Marine-Derived Streptomyces sanyensis FMA
Source: MDPI journal article supplement (doi:10.3390/md11020466), 2013-02-06
Supplement: s11 [file s11]

marinedrugs-11-00466-s006.mol
  corina  05201405133D 1   1.00000     0.00000 
CORINA 3.49 0023  12.04.2013
 35 42  0  0  0  0  0  0  0  0999 V2000
    0.1462    1.8734   -0.2568 C   0  0  0  0  0  0  0  0  0  0  0  0
    0.0249    0.4896   -0.2071 C   0  0  0  0  0  0  0  0  0  0  0  0
    1.3968    2.4777   -0.1839 C   0  0  0  0  0  0  0  0  0  0  0  0
    2.5521    1.6924   -0.0346 C   0  0  0  0  0  0  0  0  0  0  0  0
    2.4419    0.2960    0.0149 C   0  0  0  0  0  0  0  0  0  0  0  0
    1.1864   -0.3082   -0.0836 C   0  0  0  0  0  0  0  0  0  0  0  0
    1.8601    3.8649   -0.2539 C   0  0  0  0  0  0  0  0  0  0  0  0
    3.2665    3.8257   -0.1360 C   0  0  0  0  0  0  0  0  0  0  0  0
    3.6618    2.5151    0.0134 N   0  0  0  0  0  0  0  0  0  0  0  0
    3.4158   -0.6898    0.1528 N   0  0  0  0  0  0  0  0  0  0  0  0
    2.8169   -1.9260    0.0975 C   0  0  0  0  0  0  0  0  0  0  0  0
    1.4222   -1.7484   -0.0420 C   0  0  0  0  0  0  0  0  0  0  0  0
    1.1740    5.0693   -0.4032 C   0  0  0  0  0  0  0  0  0  0  0  0
    1.9401    6.2236   -0.4344 C   0  0  0  0  0  0  0  0  0  0  0  0
    3.3185    6.1877   -0.3246 C   0  0  0  0  0  0  0  0  0  0  0  0
    4.0159    5.0000   -0.1735 C   0  0  0  0  0  0  0  0  0  0  0  0
    3.3678   -3.2056    0.1592 C   0  0  0  0  0  0  0  0  0  0  0  0
    2.4897   -4.2735    0.0832 C   0  0  0  0  0  0  0  0  0  0  0  0
    1.1232   -4.0972   -0.0497 C   0  0  0  0  0  0  0  0  0  0  0  0
    0.5519   -2.8380   -0.1157 C   0  0  0  0  0  0  0  0  0  0  0  0
   -1.4016    0.1439   -0.3043 C   0  0  0  0  0  0  0  0  0  0  0  0
   -2.1466    1.2572   -0.4122 N   0  0  0  0  0  0  0  0  0  0  0  0
   -1.2531    2.4211   -0.3967 C   0  0  0  0  0  0  0  0  0  0  0  0
    5.0446    2.0757    0.2350 C   0  0  0  0  0  0  0  0  0  0  0  0
    5.6670    1.7921   -1.1060 C   0  0  0  0  0  0  0  0  0  0  0  0
    5.8813    0.5774   -1.5408 C   0  0  0  0  0  0  0  0  0  0  0  0
    5.6035   -0.5347   -0.8246 O   0  0  0  0  0  0  0  0  0  0  0  0
    4.8376   -0.4392    0.3573 C   0  0  0  0  0  0  0  0  0  0  0  0
    5.0945    0.8432    1.1181 C   0  0  0  0  0  0  0  0  0  0  0  0
   -1.8440   -0.9889   -0.2894 O   0  0  0  0  0  0  0  0  0  0  0  0
    6.4703    0.4083   -2.9176 C   0  0  0  0  0  0  0  0  0  0  0  0
    6.0201    2.8408   -1.8970 O   0  0  0  0  0  0  0  0  0  0  0  0
    7.1075    3.6532   -1.4502 C   0  0  0  0  0  0  0  0  0  0  0  0
    5.7593    3.1381    0.8695 O   0  0  0  0  0  0  0  0  0  0  0  0
    5.3292    3.4119    2.2045 C   0  0  0  0  0  0  0  0  0  0  0  0
  1  2  2  0      
  1  3  1  0      
  3  4  2  0      
  4  5  1  0      
  5  6  2  0      
  6  2  1  0      
  3  7  1  0      
  7  8  1  0      
  8  9  1  0      
  9  4  1  0      
  5 10  1  0      
 10 11  1  0      
 11 12  2  0      
 12  6  1  0      
  7 13  2  0      
 13 14  1  0      
 14 15  2  0      
 15 16  1  0      
 16  8  2  0      
 11 17  1  0      
 17 18  2  0      
 18 19  1  0      
 19 20  2  0      
 20 12  1  0      
  2 21  1  0      
 21 22  1  0      
 22 23  1  0      
 23  1  1  0      
 24 25  1  0      
 25 26  2  0      
 26 27  1  0      
 27 28  1  0      
 28 29  1  0      
 29 24  1  0      
 21 30  2  0      
 24  9  1  0      
 28 10  1  0      
 26 31  1  0      
 25 32  1  0      
 32 33  1  0      
 24 34  1  0      
 34 35  1  0      
M  STY  1   1 SUP
M  SLB  1   1   1
M  SAL   1  1  31
M  SBL   1  1  38
M  SMT   1 Me
M  SBV   1 38   -7.7344    5.1815
M  STY  1   2 SUP
M  SLB  1   2   2
M  SAL   2  2  32  33
M  SBL   2  1  39
M  SMT   2 OCH3
M  SBV   2 39   -8.4499    6.0065
M  STY  1   3 SUP
M  SLB  1   3   3
M  SAL   3  2  34  35
M  SBL   3  1  41
M  SMT   3 OCH3
M  SBV   3 41   -8.6043    5.8309
M  END
$$$$
