# Supplementary material for: Cloning, Characterization and Heterologous Expression of the Indolocarbazole Biosynthetic Gene Cluster from Marine-Derived Streptomyces sanyensis FMA
Source: MDPI journal article supplement (doi:10.3390/md11020466), 2013-02-06
Supplement: s13 [file s13]

marinedrugs-11-00466-s007.mol
  corina  05201405133D 1   1.00000     0.00000 
CORINA 3.49 0023  12.04.2013
 34 41  0  0  0  0  0  0  0  0999 V2000
   -0.0220    1.8491   -0.6356 C   0  0  0  0  0  0  0  0  0  0  0  0
   -0.1487    0.4690   -0.5210 C   0  0  0  0  0  0  0  0  0  0  0  0
    1.2246    2.4586   -0.5352 C   0  0  0  0  0  0  0  0  0  0  0  0
    2.3698    1.6757   -0.3217 C   0  0  0  0  0  0  0  0  0  0  0  0
    2.2549    0.2856   -0.2045 C   0  0  0  0  0  0  0  0  0  0  0  0
    1.0022   -0.3234   -0.2995 C   0  0  0  0  0  0  0  0  0  0  0  0
    1.6939    3.8439   -0.5994 C   0  0  0  0  0  0  0  0  0  0  0  0
    3.0960    3.8048   -0.4293 C   0  0  0  0  0  0  0  0  0  0  0  0
    3.4861    2.4967   -0.2665 N   0  0  0  0  0  0  0  0  0  0  0  0
    3.2277   -0.6879    0.0028 N   0  0  0  0  0  0  0  0  0  0  0  0
    2.6266   -1.9208    0.0562 C   0  0  0  0  0  0  0  0  0  0  0  0
    1.2342   -1.7544   -0.1271 C   0  0  0  0  0  0  0  0  0  0  0  0
    1.0148    5.0476   -0.7829 C   0  0  0  0  0  0  0  0  0  0  0  0
    1.7811    6.2020   -0.7919 C   0  0  0  0  0  0  0  0  0  0  0  0
    3.1540    6.1666   -0.6275 C   0  0  0  0  0  0  0  0  0  0  0  0
    3.8452    4.9802   -0.4433 C   0  0  0  0  0  0  0  0  0  0  0  0
    3.1694   -3.1903    0.2523 C   0  0  0  0  0  0  0  0  0  0  0  0
    2.2890   -4.2587    0.2578 C   0  0  0  0  0  0  0  0  0  0  0  0
    0.9266   -4.0937    0.0770 C   0  0  0  0  0  0  0  0  0  0  0  0
    0.3622   -2.8450   -0.1192 C   0  0  0  0  0  0  0  0  0  0  0  0
   -1.5698    0.1190   -0.6700 C   0  0  0  0  0  0  0  0  0  0  0  0
   -2.3063    1.2250   -0.8701 N   0  0  0  0  0  0  0  0  0  0  0  0
   -1.4121    2.3883   -0.8692 C   0  0  0  0  0  0  0  0  0  0  0  0
    4.8553    2.0211   -0.0629 C   0  0  0  0  0  0  0  0  0  0  0  0
    5.5731    1.8663   -1.3980 C   0  0  0  0  0  0  0  0  0  0  0  0
    5.0739    0.5984   -2.1000 C   0  0  0  0  0  0  0  0  0  0  0  0
    5.3731   -0.5983   -1.1901 C   0  0  0  0  0  0  0  0  0  0  0  0
    4.6583   -0.4127    0.1431 C   0  0  0  0  0  0  0  0  0  0  0  0
    4.9083    0.8495    0.7187 O   0  0  0  0  0  0  0  0  0  0  0  0
    3.6659    0.6937   -2.3248 O   0  0  0  0  0  0  0  0  0  0  0  0
   -2.0151   -1.0116   -0.6196 O   0  0  0  0  0  0  0  0  0  0  0  0
    5.3024    3.0039   -2.2194 O   0  0  0  0  0  0  0  0  0  0  0  0
    6.3563    3.3288   -3.1280 C   0  0  0  0  0  0  0  0  0  0  0  0
    5.5872    3.1158    0.7161 C   0  0  0  0  0  0  0  0  0  0  0  0
  1  2  2  0      
  1  3  1  0      
  3  4  2  0      
  4  5  1  0      
  5  6  2  0      
  6  2  1  0      
  3  7  1  0      
  7  8  1  0      
  8  9  1  0      
  9  4  1  0      
  5 10  1  0      
 10 11  1  0      
 11 12  2  0      
 12  6  1  0      
  7 13  2  0      
 13 14  1  0      
 14 15  2  0      
 15 16  1  0      
 16  8  2  0      
 11 17  1  0      
 17 18  2  0      
 18 19  1  0      
 19 20  2  0      
 20 12  1  0      
  2 21  1  0      
 21 22  1  0      
 22 23  1  0      
 23  1  1  0      
 24 25  1  0      
 25 26  1  0      
 26 27  1  0      
 27 28  1  0      
 28 29  1  0      
 29 24  1  0      
 21 31  2  0      
 24  9  1  0      
 28 10  1  0      
 26 30  1  0      
 25 32  1  0      
 32 33  1  0      
 24 34  1  0      
M  STY  1   1 SUP
M  SLB  1   1   1
M  SAL   1  2  32  33
M  SBL   1  1  39
M  SMT   1 OCH3
M  SBV   1 39   -8.5737    5.6971
M  STY  1   2 SUP
M  SLB  1   2   2
M  SAL   2  1  34
M  SBL   2  1  41
M  SMT   2 Me
M  SBV   2 41   -8.6562    5.4840
M  END
$$$$
