# Supplementary material for: Cloning, Characterization and Heterologous Expression of the Indolocarbazole Biosynthetic Gene Cluster from Marine-Derived Streptomyces sanyensis FMA
Source: MDPI journal article supplement (doi:10.3390/md11020466), 2013-02-06
Supplement: s14 [file s14]

marinedrugs-11-00466-s007.mol
  ChemDraw04241410152D

 34 41  0  0  0  0  0  0  0  0999 V2000
   -0.4125    1.8402    0.0000 C   0  0  0  0  0  0  0  0  0  0  0  0
    0.4125    1.8402    0.0000 C   0  0  0  0  0  0  0  0  0  0  0  0
   -0.8250    1.1258    0.0000 C   0  0  0  0  0  0  0  0  0  0  0  0
   -0.4125    0.4113    0.0000 C   0  0  0  0  0  0  0  0  0  0  0  0
    0.4125    0.4113    0.0000 C   0  0  0  0  0  0  0  0  0  0  0  0
    0.8250    1.1258    0.0000 C   0  0  0  0  0  0  0  0  0  0  0  0
   -1.6320    0.9542    0.0000 C   0  0  0  0  0  0  0  0  0  0  0  0
   -1.7182    0.1337    0.0000 C   0  0  0  0  0  0  0  0  0  0  0  0
   -0.9645   -0.2018    0.0000 N   0  0  0  0  0  0  0  0  0  0  0  0
    0.9645   -0.2018    0.0000 N   0  0  0  0  0  0  0  0  0  0  0  0
    1.7182    0.1337    0.0000 C   0  0  0  0  0  0  0  0  0  0  0  0
    1.6320    0.9542    0.0000 C   0  0  0  0  0  0  0  0  0  0  0  0
   -2.2994    1.4392    0.0000 C   0  0  0  0  0  0  0  0  0  0  0  0
   -3.0531    1.1036    0.0000 C   0  0  0  0  0  0  0  0  0  0  0  0
   -3.1393    0.2831    0.0000 C   0  0  0  0  0  0  0  0  0  0  0  0
   -2.4719   -0.2018    0.0000 C   0  0  0  0  0  0  0  0  0  0  0  0
    2.4719   -0.2018    0.0000 C   0  0  0  0  0  0  0  0  0  0  0  0
    3.1393    0.2831    0.0000 C   0  0  0  0  0  0  0  0  0  0  0  0
    3.0531    1.1036    0.0000 C   0  0  0  0  0  0  0  0  0  0  0  0
    2.2994    1.4392    0.0000 C   0  0  0  0  0  0  0  0  0  0  0  0
    0.6674    2.6248    0.0000 C   0  0  0  0  0  0  0  0  0  0  0  0
    0.0000    3.1098    0.0000 N   0  0  0  0  0  0  0  0  0  0  0  0
   -0.6674    2.6248    0.0000 C   0  0  0  0  0  0  0  0  0  0  0  0
   -0.6938   -1.0473    0.0000 C   0  0  0  0  0  0  0  0  0  0  0  0
   -0.6938   -1.8723    0.0000 C   0  0  0  0  0  0  0  0  0  0  0  0
    0.0206   -2.2848    0.0000 C   0  0  0  0  0  0  0  0  0  0  0  0
    0.7351   -1.8723    0.0000 C   0  0  0  0  0  0  0  0  0  0  0  0
    0.7351   -1.0473    0.0000 C   0  0  0  0  0  0  0  0  0  0  0  0
    0.0206   -0.6348    0.0000 O   0  0  0  0  0  0  0  0  0  0  0  0
    0.0206   -3.1098    0.0000 O   0  0  0  0  0  0  0  0  0  0  0  0
    1.4643    2.8384    0.0000 O   0  0  0  0  0  0  0  0  0  0  0  0
   -1.4094   -1.8723    0.0000 O   0  0  0  0  0  0  0  0  0  0  0  0
   -0.6949   -2.2848    0.0000 C   0  0  0  0  0  0  0  0  0  0  0  0
   -1.4919   -1.2604    0.0000 C   0  0  0  0  0  0  0  0  0  0  0  0
  1  2  2  0      
  1  3  1  0      
  3  4  2  0      
  4  5  1  0      
  5  6  2  0      
  6  2  1  0      
  3  7  1  0      
  7  8  1  0      
  8  9  1  0      
  9  4  1  0      
  5 10  1  0      
 10 11  1  0      
 11 12  2  0      
 12  6  1  0      
  7 13  2  0      
 13 14  1  0      
 14 15  2  0      
 15 16  1  0      
 16  8  2  0      
 11 17  1  0      
 17 18  2  0      
 18 19  1  0      
 19 20  2  0      
 20 12  1  0      
  2 21  1  0      
 21 22  1  0      
 22 23  1  0      
 23  1  1  0      
 24 25  1  0      
 25 26  1  0      
 26 27  1  0      
 27 28  1  0      
 28 29  1  0      
 29 24  1  0      
 21 31  2  0      
 24  9  1  0      
 28 10  1  0      
 26 30  1  0      
 25 32  1  0      
 32 33  1  0      
 24 34  1  0      
M  STY  1   1 SUP
M  SLB  1   1   1
M  SAL   1  2  32  33
M  SBL   1  1  39
M  SMT   1 OCH3
M  SBV   1 39   -8.5737    5.6971
M  STY  1   2 SUP
M  SLB  1   2   2
M  SAL   2  1  34
M  SBL   2  1  41
M  SMT   2 Me
M  SBV   2 41   -8.6562    5.4840
M  END
