# Supplementary material for: Cloning, Characterization and Heterologous Expression of the Indolocarbazole Biosynthetic Gene Cluster from Marine-Derived Streptomyces sanyensis FMA
Source: MDPI journal article supplement (doi:10.3390/md11020466), 2013-02-06
Supplement: s15 [file s15]

marinedrugs-11-00466-s008.msm
  corina  05201405133D 1   1.00000     0.00000 
CORINA 3.49 0023  12.04.2013
 35 42  0  0  0  0  0  0  0  0999 V2000
    0.1606    1.9459   -1.2495 C   0  0  0  0  0  0  0  0  0  0  0  0
   -0.0570    0.5903   -1.0172 C   0  0  0  0  0  0  0  0  0  0  0  0
    1.4152    2.5126   -1.0466 C   0  0  0  0  0  0  0  0  0  0  0  0
    2.4599    1.7138   -0.5645 C   0  0  0  0  0  0  0  0  0  0  0  0
    2.2552    0.3483   -0.3337 C   0  0  0  0  0  0  0  0  0  0  0  0
    1.0104   -0.2283   -0.5782 C   0  0  0  0  0  0  0  0  0  0  0  0
    2.0045    3.8365   -1.2537 C   0  0  0  0  0  0  0  0  0  0  0  0
    3.3624    3.7446   -0.8655 C   0  0  0  0  0  0  0  0  0  0  0  0
    3.6107    2.4689   -0.4207 N   0  0  0  0  0  0  0  0  0  0  0  0
    3.1512   -0.6174    0.1063 N   0  0  0  0  0  0  0  0  0  0  0  0
    2.5272   -1.8385    0.0853 C   0  0  0  0  0  0  0  0  0  0  0  0
    1.1821   -1.6546   -0.3194 C   0  0  0  0  0  0  0  0  0  0  0  0
    1.4618    5.0302   -1.7268 C   0  0  0  0  0  0  0  0  0  0  0  0
    2.3160    6.1180   -1.8069 C   0  0  0  0  0  0  0  0  0  0  0  0
    3.6457    6.0287   -1.4370 C   0  0  0  0  0  0  0  0  0  0  0  0
    4.2021    4.8529   -0.9611 C   0  0  0  0  0  0  0  0  0  0  0  0
    3.0076   -3.1120    0.3882 C   0  0  0  0  0  0  0  0  0  0  0  0
    2.1156   -4.1654    0.2849 C   0  0  0  0  0  0  0  0  0  0  0  0
    0.7992   -3.9824   -0.1021 C   0  0  0  0  0  0  0  0  0  0  0  0
    0.2974   -2.7307   -0.4135 C   0  0  0  0  0  0  0  0  0  0  0  0
   -1.4673    0.2908   -1.3100 C   0  0  0  0  0  0  0  0  0  0  0  0
   -2.1086    1.3998   -1.7147 N   0  0  0  0  0  0  0  0  0  0  0  0
   -1.1565    2.5159   -1.7169 C   0  0  0  0  0  0  0  0  0  0  0  0
   -1.9804   -0.8065   -1.2011 O   0  0  0  0  0  0  0  0  0  0  0  0
    4.8482    1.9688    0.1868 C   0  0  0  0  0  0  0  0  0  0  0  0
    5.6813    1.2466   -0.8917 C   0  0  0  0  0  0  0  0  0  0  0  0
    5.4583   -0.2577   -0.6333 C   0  0  0  0  0  0  0  0  0  0  0  0
    4.5073   -0.3216    0.5794 C   0  0  0  0  0  0  0  0  0  0  0  0
    4.5526    0.9775    1.1715 O   0  0  0  0  0  0  0  0  0  0  0  0
    5.6545    3.1119    0.8066 C   0  0  0  0  0  0  0  0  0  0  0  0
    7.0651    1.5742   -0.7513 O   0  0  0  0  0  0  0  0  0  0  0  0
    5.1915    1.6192   -2.2674 C   0  0  0  0  0  0  0  0  0  0  0  0
    4.0519    1.9891   -2.4233 O   0  0  0  0  0  0  0  0  0  0  0  0
    6.0213    1.5400   -3.3195 O   0  0  0  0  0  0  0  0  0  0  0  0
    5.4815    1.9145   -4.6144 C   0  0  0  0  0  0  0  0  0  0  0  0
  1  2  2  0      
  1  3  1  0      
  3  4  2  0      
  4  5  1  0      
  5  6  2  0      
  6  2  1  0      
  3  7  1  0      
  7  8  1  0      
  8  9  1  0      
  9  4  1  0      
  5 10  1  0      
 10 11  1  0      
 11 12  2  0      
 12  6  1  0      
  7 13  2  0      
 13 14  1  0      
 14 15  2  0      
 15 16  1  0      
 16  8  2  0      
 11 17  1  0      
 17 18  2  0      
 18 19  1  0      
 19 20  2  0      
 20 12  1  0      
  2 21  1  0      
 21 22  1  0      
 22 23  1  0      
 23  1  1  0      
 21 24  2  0      
 25 26  1  0      
 26 27  1  0      
 27 28  1  0      
 28 29  1  0      
 29 25  1  0      
 25  9  1  0      
 28 10  1  0      
 25 30  1  0      
 26 31  1  0      
 26 32  1  0      
 32 33  2  0      
 32 34  1  0      
 34 35  1  0      
M  STY  1   1 SUP
M  SLB  1   1   1
M  SAL   1  2  34  35
M  SBL   1  1  41
M  SMT   1 OCH3
M  SBV   1 41   -8.3058    4.7618
M  END
$$$$
