# Supplementary material for: Cloning, Characterization and Heterologous Expression of the Indolocarbazole Biosynthetic Gene Cluster from Marine-Derived Streptomyces sanyensis FMA
Source: MDPI journal article supplement (doi:10.3390/md11020466), 2013-02-06
Supplement: s16 [file s16]

marinedrugs-11-00466-s008.msm
  ChemDraw04241410152D

 35 42  0  0  0  0  0  0  0  0999 V2000
   -0.4125    1.8013    0.0000 C   0  0  0  0  0  0  0  0  0  0  0  0
    0.4125    1.8013    0.0000 C   0  0  0  0  0  0  0  0  0  0  0  0
   -0.8250    1.0868    0.0000 C   0  0  0  0  0  0  0  0  0  0  0  0
   -0.4125    0.3723    0.0000 C   0  0  0  0  0  0  0  0  0  0  0  0
    0.4125    0.3723    0.0000 C   0  0  0  0  0  0  0  0  0  0  0  0
    0.8250    1.0868    0.0000 C   0  0  0  0  0  0  0  0  0  0  0  0
   -1.6320    0.9153    0.0000 C   0  0  0  0  0  0  0  0  0  0  0  0
   -1.7182    0.0948    0.0000 C   0  0  0  0  0  0  0  0  0  0  0  0
   -0.9645   -0.2408    0.0000 N   0  0  0  0  0  0  0  0  0  0  0  0
    0.9645   -0.2408    0.0000 N   0  0  0  0  0  0  0  0  0  0  0  0
    1.7182    0.0948    0.0000 C   0  0  0  0  0  0  0  0  0  0  0  0
    1.6320    0.9153    0.0000 C   0  0  0  0  0  0  0  0  0  0  0  0
   -2.2994    1.4002    0.0000 C   0  0  0  0  0  0  0  0  0  0  0  0
   -3.0531    1.0647    0.0000 C   0  0  0  0  0  0  0  0  0  0  0  0
   -3.1393    0.2442    0.0000 C   0  0  0  0  0  0  0  0  0  0  0  0
   -2.4719   -0.2408    0.0000 C   0  0  0  0  0  0  0  0  0  0  0  0
    2.4719   -0.2408    0.0000 C   0  0  0  0  0  0  0  0  0  0  0  0
    3.1393    0.2442    0.0000 C   0  0  0  0  0  0  0  0  0  0  0  0
    3.0531    1.0647    0.0000 C   0  0  0  0  0  0  0  0  0  0  0  0
    2.2994    1.4002    0.0000 C   0  0  0  0  0  0  0  0  0  0  0  0
    0.6674    2.5859    0.0000 C   0  0  0  0  0  0  0  0  0  0  0  0
    0.0000    3.0708    0.0000 N   0  0  0  0  0  0  0  0  0  0  0  0
   -0.6674    2.5859    0.0000 C   0  0  0  0  0  0  0  0  0  0  0  0
    1.4643    2.7994    0.0000 O   0  0  0  0  0  0  0  0  0  0  0  0
   -0.6228   -1.3821    0.0000 C   0  0  0  0  0  0  0  0  0  0  0  0
   -0.3693   -2.1672    0.0000 C   0  0  0  0  0  0  0  0  0  0  0  0
    0.4557   -2.1688    0.0000 C   0  0  0  0  0  0  0  0  0  0  0  0
    0.7121   -1.3846    0.0000 C   0  0  0  0  0  0  0  0  0  0  0  0
    0.0456   -0.8984    0.0000 O   0  0  0  0  0  0  0  0  0  0  0  0
   -1.4478   -1.3821    0.0000 C   0  0  0  0  0  0  0  0  0  0  0  0
   -0.3693   -2.9922    0.0000 O   0  0  0  0  0  0  0  0  0  0  0  0
   -1.1662   -2.3807    0.0000 C   0  0  0  0  0  0  0  0  0  0  0  0
   -1.8807   -1.9682    0.0000 O   0  0  0  0  0  0  0  0  0  0  0  0
   -1.7789   -3.0708    0.0000 O   0  0  0  0  0  0  0  0  0  0  0  0
   -2.3623   -2.4875    0.0000 C   0  0  0  0  0  0  0  0  0  0  0  0
  1  2  2  0      
  1  3  1  0      
  3  4  2  0      
  4  5  1  0      
  5  6  2  0      
  6  2  1  0      
  3  7  1  0      
  7  8  1  0      
  8  9  1  0      
  9  4  1  0      
  5 10  1  0      
 10 11  1  0      
 11 12  2  0      
 12  6  1  0      
  7 13  2  0      
 13 14  1  0      
 14 15  2  0      
 15 16  1  0      
 16  8  2  0      
 11 17  1  0      
 17 18  2  0      
 18 19  1  0      
 19 20  2  0      
 20 12  1  0      
  2 21  1  0      
 21 22  1  0      
 22 23  1  0      
 23  1  1  0      
 21 24  2  0      
 25 26  1  0      
 26 27  1  0      
 27 28  1  0      
 28 29  1  0      
 29 25  1  0      
 25  9  1  1      
 28 10  1  1      
 25 30  1  6      
 26 31  1  6      
 26 32  1  1      
 32 33  2  0      
 32 34  1  0      
 34 35  1  0      
M  STY  1   1 SUP
M  SLB  1   1   1
M  SAL   1  2  34  35
M  SBL   1  1  41
M  SMT   1 OCH3
M  SBV   1 41   -8.3058    4.7618
M  END
