# Supplementary material for: Cloning, Characterization and Heterologous Expression of the Indolocarbazole Biosynthetic Gene Cluster from Marine-Derived Streptomyces sanyensis FMA
Source: MDPI journal article supplement (doi:10.3390/md11020466), 2013-02-06
Supplement: s17 [file s17]

marinedrugs-11-00466-s009.mol
  corina  05201405133D 1   1.00000     0.00000 
CORINA 3.49 0023  12.04.2013
 24 29  0  0  0  0  0  0  0  0999 V2000
   -0.0168    1.3869    0.0097 C   0  0  0  0  0  0  0  0  0  0  0  0
    0.0021   -0.0041    0.0020 C   0  0  0  0  0  0  0  0  0  0  0  0
    1.1717    2.1068    0.0022 C   0  0  0  0  0  0  0  0  0  0  0  0
    2.4065    1.4407   -0.0132 C   0  0  0  0  0  0  0  0  0  0  0  0
    2.4386    0.0389   -0.0210 C   0  0  0  0  0  0  0  0  0  0  0  0
    1.2426   -0.6806   -0.0139 C   0  0  0  0  0  0  0  0  0  0  0  0
    1.4785    3.5503    0.0070 C   0  0  0  0  0  0  0  0  0  0  0  0
    2.8771    3.6595   -0.0058 C   0  0  0  0  0  0  0  0  0  0  0  0
    3.4131    2.3848   -0.0177 N   0  0  0  0  0  0  0  0  0  0  0  0
    3.4920   -0.8605   -0.0355 N   0  0  0  0  0  0  0  0  0  0  0  0
    3.0126   -2.1559   -0.0377 C   0  0  0  0  0  0  0  0  0  0  0  0
    1.6095   -2.1056   -0.0246 C   0  0  0  0  0  0  0  0  0  0  0  0
    0.6892    4.6972    0.0207 C   0  0  0  0  0  0  0  0  0  0  0  0
    1.2870    5.9395    0.0216 C   0  0  0  0  0  0  0  0  0  0  0  0
    2.6687    6.0495    0.0086 C   0  0  0  0  0  0  0  0  0  0  0  0
    3.4619    4.9220   -0.0046 C   0  0  0  0  0  0  0  0  0  0  0  0
    3.6503   -3.3931   -0.0506 C   0  0  0  0  0  0  0  0  0  0  0  0
    2.9058   -4.5524   -0.0504 C   0  0  0  0  0  0  0  0  0  0  0  0
    1.5196   -4.5015   -0.0372 C   0  0  0  0  0  0  0  0  0  0  0  0
    0.8692   -3.2875   -0.0238 C   0  0  0  0  0  0  0  0  0  0  0  0
   -1.3869   -0.4876    0.0132 C   0  0  0  0  0  0  0  0  0  0  0  0
   -2.2433    0.5480    0.0272 N   0  0  0  0  0  0  0  0  0  0  0  0
   -1.4694    1.7947    0.0318 C   0  0  0  0  0  0  0  0  0  0  0  0
   -1.7141   -1.6589    0.0098 O   0  0  0  0  0  0  0  0  0  0  0  0
  1  2  1  0      
  1  3  2  0      
  3  4  1  0      
  4  5  2  0      
  5  6  1  0      
  6  2  2  0      
  3  7  1  0      
  7  8  1  0      
  8  9  1  0      
  9  4  1  0      
  5 10  1  0      
 10 11  1  0      
 11 12  2  0      
 12  6  1  0      
  7 13  2  0      
 13 14  1  0      
 14 15  2  0      
 15 16  1  0      
 16  8  2  0      
 11 17  1  0      
 17 18  2  0      
 18 19  1  0      
 19 20  2  0      
 20 12  1  0      
  2 21  1  0      
 21 22  1  0      
 22 23  1  0      
 23  1  1  0      
 21 24  2  0      
M  END
$$$$
