# Supplementary material for: Cloning, Characterization and Heterologous Expression of the Indolocarbazole Biosynthetic Gene Cluster from Marine-Derived Streptomyces sanyensis FMA
Source: MDPI journal article supplement (doi:10.3390/md11020466), 2013-02-06
Supplement: s19 [file s19]

marinedrugs-11-00466-s010.mol
  corina  05201405143D 1   1.00000     0.00000 
CORINA 3.49 0023  12.04.2013
 25 29  0  0  0  0  0  0  0  0999 V2000
   -0.0168    1.3858    0.0097 C   0  0  0  0  0  0  0  0  0  0  0  0
    0.0021   -0.0041    0.0020 C   0  0  0  0  0  0  0  0  0  0  0  0
    1.1478    2.2870    0.0034 C   0  0  0  0  0  0  0  0  0  0  0  0
    1.9556    2.5685   -1.0588 C   0  0  0  0  0  0  0  0  0  0  0  0
    2.0255   -1.1324    1.0333 C   0  0  0  0  0  0  0  0  0  0  0  0
    1.1906   -0.8732   -0.0136 C   0  0  0  0  0  0  0  0  0  0  0  0
    1.6651    3.0665    1.1418 C   0  0  0  0  0  0  0  0  0  0  0  0
    2.7797    3.7693    0.6552 C   0  0  0  0  0  0  0  0  0  0  0  0
    2.9252    3.4444   -0.6775 N   0  0  0  0  0  0  0  0  0  0  0  0
    3.0113   -1.9817    0.6339 N   0  0  0  0  0  0  0  0  0  0  0  0
    2.8521   -2.3079   -0.6970 C   0  0  0  0  0  0  0  0  0  0  0  0
    1.7114   -1.6336   -1.1633 C   0  0  0  0  0  0  0  0  0  0  0  0
    1.2769    3.2079    2.4723 C   0  0  0  0  0  0  0  0  0  0  0  0
    1.9913    4.0397    3.3065 C   0  0  0  0  0  0  0  0  0  0  0  0
    3.0924    4.7345    2.8272 C   0  0  0  0  0  0  0  0  0  0  0  0
    3.4884    4.6033    1.5138 C   0  0  0  0  0  0  0  0  0  0  0  0
    3.5691   -3.1196   -1.5698 C   0  0  0  0  0  0  0  0  0  0  0  0
    3.1574   -3.2552   -2.8779 C   0  0  0  0  0  0  0  0  0  0  0  0
    2.0315   -2.5874   -3.3376 C   0  0  0  0  0  0  0  0  0  0  0  0
    1.3072   -1.7795   -2.4885 C   0  0  0  0  0  0  0  0  0  0  0  0
   -1.4119   -0.4328    0.0132 C   0  0  0  0  0  0  0  0  0  0  0  0
   -2.1921    0.6611    0.0266 N   0  0  0  0  0  0  0  0  0  0  0  0
   -1.4419    1.7759    0.0189 C   0  0  0  0  0  0  0  0  0  0  0  0
   -1.8037   -1.5828    0.0104 O   0  0  0  0  0  0  0  0  0  0  0  0
   -1.8648    2.9148    0.0278 O   0  0  0  0  0  0  0  0  0  0  0  0
  1  2  2  0      
  1  3  1  0      
  3  4  2  0      
  5  6  2  0      
  6  2  1  0      
  3  7  1  0      
  7  8  1  0      
  8  9  1  0      
  9  4  1  0      
  5 10  1  0      
 10 11  1  0      
 11 12  2  0      
 12  6  1  0      
  7 13  2  0      
 13 14  1  0      
 14 15  2  0      
 15 16  1  0      
 16  8  2  0      
 11 17  1  0      
 17 18  2  0      
 18 19  1  0      
 19 20  2  0      
 20 12  1  0      
  2 21  1  0      
 21 22  1  0      
 22 23  1  0      
 23  1  1  0      
 21 24  2  0      
 23 25  2  0      
M  END
$$$$
