# Supplementary material for: Cloning, Characterization and Heterologous Expression of the Indolocarbazole Biosynthetic Gene Cluster from Marine-Derived Streptomyces sanyensis FMA
Source: MDPI journal article supplement (doi:10.3390/md11020466), 2013-02-06
Supplement: s20 [file s20]

marinedrugs-11-00466-s010.mol
  ChemDraw04241410162D

 25 29  0  0  0  0  0  0  0  0999 V2000
   -0.4125    0.3862    0.0000 C   0  0  0  0  0  0  0  0  0  0  0  0
    0.4125    0.3862    0.0000 C   0  0  0  0  0  0  0  0  0  0  0  0
   -0.8250   -0.3282    0.0000 C   0  0  0  0  0  0  0  0  0  0  0  0
   -0.4125   -1.0427    0.0000 C   0  0  0  0  0  0  0  0  0  0  0  0
    0.4125   -1.0427    0.0000 C   0  0  0  0  0  0  0  0  0  0  0  0
    0.8250   -0.3282    0.0000 C   0  0  0  0  0  0  0  0  0  0  0  0
   -1.6320   -0.4998    0.0000 C   0  0  0  0  0  0  0  0  0  0  0  0
   -1.7182   -1.3202    0.0000 C   0  0  0  0  0  0  0  0  0  0  0  0
   -0.9645   -1.6558    0.0000 N   0  0  0  0  0  0  0  0  0  0  0  0
    0.9645   -1.6558    0.0000 N   0  0  0  0  0  0  0  0  0  0  0  0
    1.7182   -1.3202    0.0000 C   0  0  0  0  0  0  0  0  0  0  0  0
    1.6320   -0.4998    0.0000 C   0  0  0  0  0  0  0  0  0  0  0  0
   -2.2994   -0.0148    0.0000 C   0  0  0  0  0  0  0  0  0  0  0  0
   -3.0531   -0.3504    0.0000 C   0  0  0  0  0  0  0  0  0  0  0  0
   -3.1393   -1.1709    0.0000 C   0  0  0  0  0  0  0  0  0  0  0  0
   -2.4719   -1.6558    0.0000 C   0  0  0  0  0  0  0  0  0  0  0  0
    2.4719   -1.6558    0.0000 C   0  0  0  0  0  0  0  0  0  0  0  0
    3.1393   -1.1709    0.0000 C   0  0  0  0  0  0  0  0  0  0  0  0
    3.0531   -0.3504    0.0000 C   0  0  0  0  0  0  0  0  0  0  0  0
    2.2994   -0.0148    0.0000 C   0  0  0  0  0  0  0  0  0  0  0  0
    0.6674    1.1709    0.0000 C   0  0  0  0  0  0  0  0  0  0  0  0
    0.0000    1.6558    0.0000 N   0  0  0  0  0  0  0  0  0  0  0  0
   -0.6674    1.1709    0.0000 C   0  0  0  0  0  0  0  0  0  0  0  0
    1.4643    1.3844    0.0000 O   0  0  0  0  0  0  0  0  0  0  0  0
   -1.4643    1.3844    0.0000 O   0  0  0  0  0  0  0  0  0  0  0  0
  1  2  2  0      
  1  3  1  0      
  3  4  2  0      
  5  6  2  0      
  6  2  1  0      
  3  7  1  0      
  7  8  1  0      
  8  9  1  0      
  9  4  1  0      
  5 10  1  0      
 10 11  1  0      
 11 12  2  0      
 12  6  1  0      
  7 13  2  0      
 13 14  1  0      
 14 15  2  0      
 15 16  1  0      
 16  8  2  0      
 11 17  1  0      
 17 18  2  0      
 18 19  1  0      
 19 20  2  0      
 20 12  1  0      
  2 21  1  0      
 21 22  1  0      
 22 23  1  0      
 23  1  1  0      
 21 24  2  0      
 23 25  2  0      
M  END
